# Supplementary material for: Development of a QuEChERS-Based UHPLC-MS/MS Method for Simultaneous Determination of Six Alternaria Toxins in Grapes
Source: PubMed Central journal article supplement (PMC6410285; doi:10.3390/toxins11020087), 2019-02-01
Supplement: toxins-11-00087-s001.pdf [file toxins-11-00087-s001.pdf]

# Supplementary Materials: Development of a QuEChERS-Based UHPLC-MS/MS Method for Simultaneous Determination of Six *Alternaria* Toxins in Grapes

Wenbo Guo, Kai Fan, Dongxia Nie, Jiajia Meng, Qingwen Huang Junhua Yang, Yuanyuan Shen, Emmanuel K. Tangni, Zhihui Zhao, Yongjiang Wu and Zheng Han

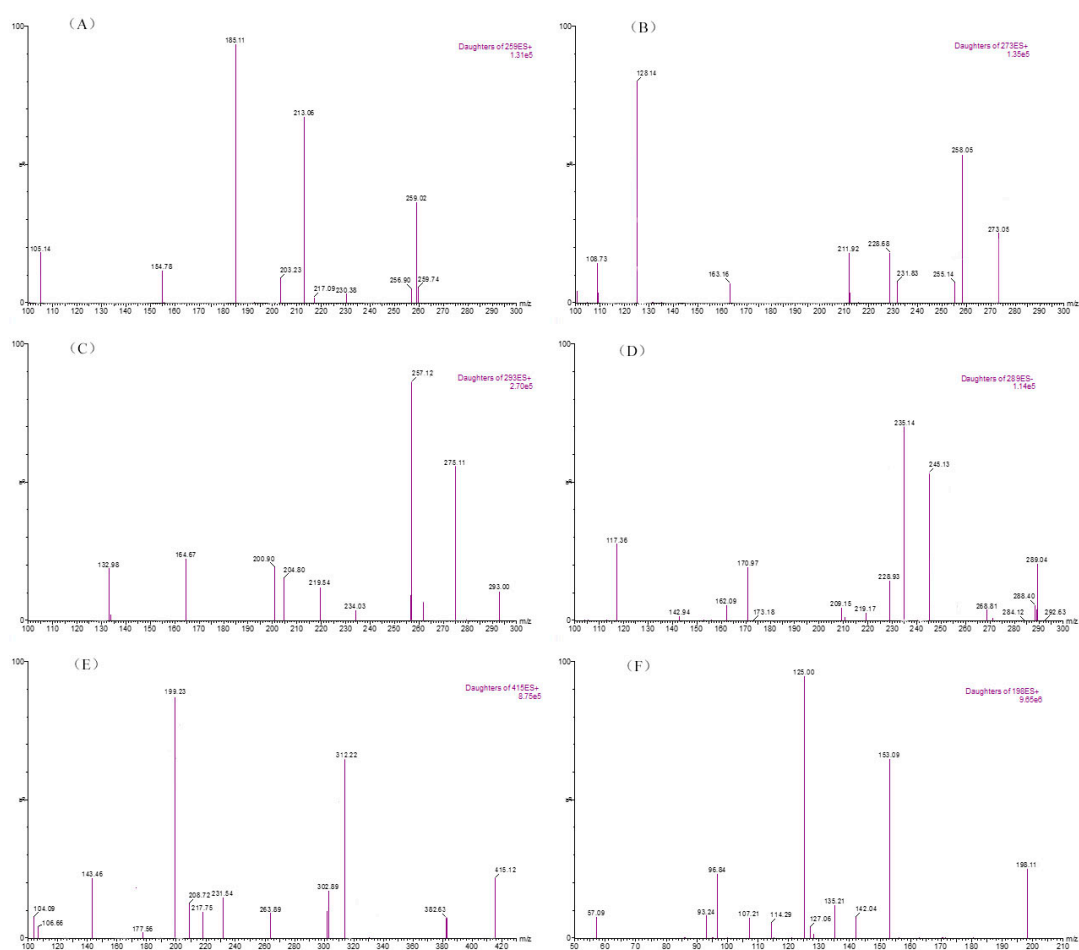

**Figure 1.** MS/MS spectra for AOH with the collision energy of 28 eV (A), for AME with the collision energy of 26 eV (B), for ALT with the collision energy of 14 eV (C), for ALS with the collision energy of -20 eV (D), for TEN with the collision energy of 12 eV (E) and for TeA with the collision energy of 16 eV (F). The concentration for all *Alternaria* toxins was 200 ng mL<sup>-1</sup>.

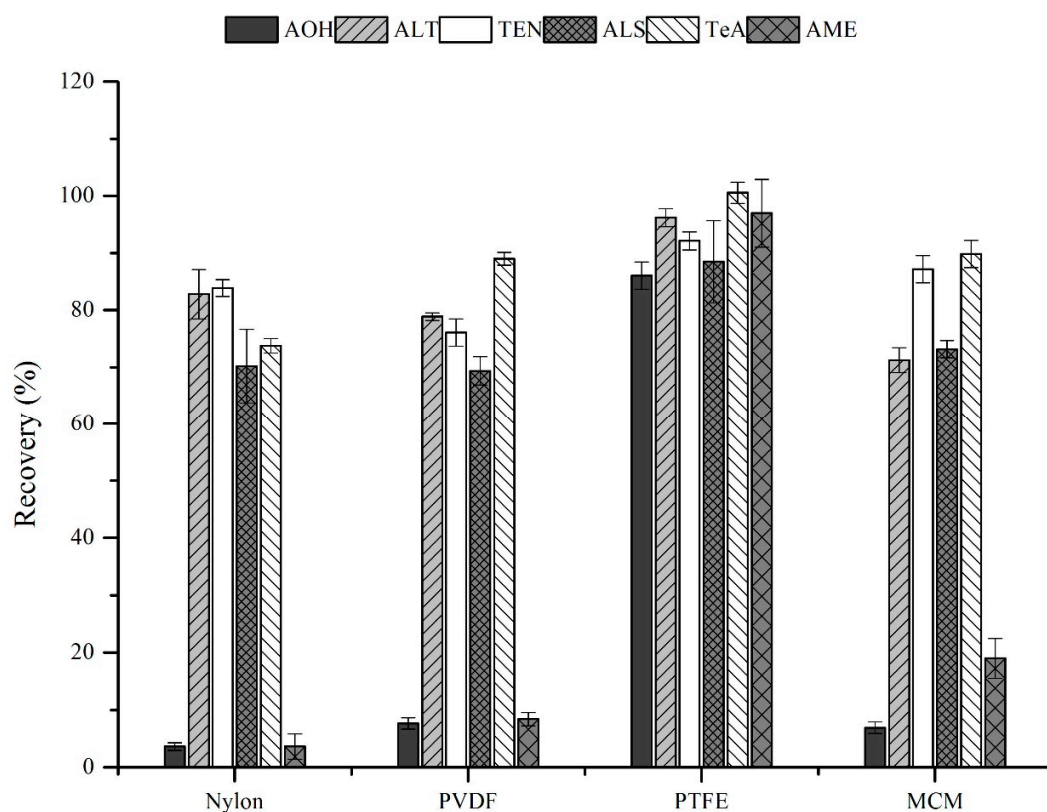

**Figure 2.** Recoveries of the six *Alternaria* toxins in a standard solution filtered by different membrane filters. The concentration is  $50 \mu\text{g kg}^{-1}$  ( $n = 6$ ).

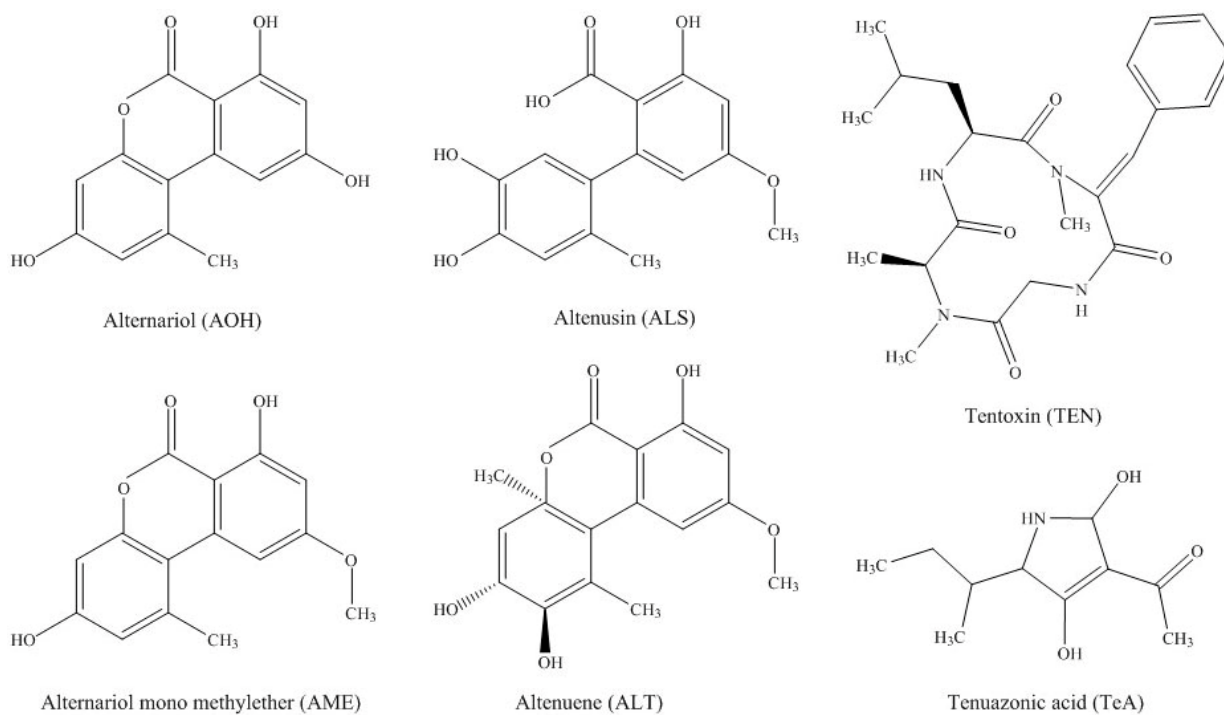

**Figure 3.** Chemical structures of the six *Alternaria* toxins.
